# Supplementary material for: La empresa privada y las I.D.E.
Source: Royal Society of Chemistry journal article supplement (doi:10.1039/d2ob01488b), 2011-01-01

# Supporting Information for

## Copper-Catalyzed Construction of (*Z*)-Benzo[*cd*]indoles: Stereoselective Intramolecular *trans*-Addition and S<sub>N</sub>-Ar Reaction

Xinyue Wang,<sup>a,b,#</sup> Heyang Zeng,<sup>a,#</sup> Wenli Zhang,<sup>a,#</sup> Haiyang Guo,<sup>b,\*</sup> Tao Jin,<sup>a</sup> Senlei Shi,<sup>a</sup> Xiaoyuan Jin,<sup>a</sup> Na Qu,<sup>a</sup> Li Liu,<sup>a,\*</sup> and Lianpeng Zhang<sup>a,\*</sup>

<sup>a</sup> Yunnan Key Laboratory of Wood Adhesive and Glued Products, Southwest Forestry University, Kunming 650224, Yunnan, China

<sup>b</sup> College of Biological, Chemical Sciences and Engineering, Jiaying University, Jiaying 314001, Zhejiang, China

<sup>#</sup> These authors contributed equally to this work

*E-mail:* guohy@zjxu.edu.cn (*H. Guo*); liuli0573@qq.com (*L. Liu*); lpz@zju.edu.cn (*L. Zhang*)

---

### Table of contents

|                                                                   |    |
|-------------------------------------------------------------------|----|
| 1. General                                                        | P2 |
| 2. The details information of the crystal of <b>2f</b>            | P3 |
| 3. Structures of <b>1a-1q</b> and <b>4a-4b</b>                    | P7 |
| 4. Structures of <b>2a-2o</b> and <b>5</b>                        | P8 |
| 5. Copies of the Products <sup>1</sup> H NMR, <sup>13</sup> C NMR | P9 |

## 1. General

Unless stated otherwise, reactions were conducted in dried glassware. Commercially available reagents and solvents were used as received. 300-400 Mesh silica gel was used for flash column chromatography. Visualization on TLC was achieved by the use of UV light (254 nm). 400 MHz and 100 MHz were used for the record of  $^1\text{H}$  NMR and  $^{13}\text{C}$  NMR spectra. Chemical shifts ( $\delta$  ppm) were reported in parts per million referring to either the internal standard of TMS or the residue of the deuterated solvents. Splitting pattern was described as follows: s for singlet, d for doublet, t for triplet, q for quartet, and m for multiplet. Coupling constants were reported in Hz. The high-resolution mass spectrum (HRMS) was performed on Waters Xevo G2-S QToF mass spectrometer. The crystal of **2f** was measured on Agilent Gemini E and the solvent system for crystal growth is dichloromethane and petroleum ether. PE is petroleum ether, and EA is ethyl acetate.

## 2. The details information of the crystal of 2f

### checkCIF/PLATON report

You have not supplied any structure factors. As a result the full set of tests cannot be run.

THIS REPORT IS FOR GUIDANCE ONLY. IF USED AS PART OF A REVIEW PROCEDURE FOR PUBLICATION, IT SHOULD NOT REPLACE THE EXPERTISE OF AN EXPERIENCED CRYSTALLOGRAPHIC REFEREE.

No syntax errors found. CIF dictionary Interpreting this report

### Datablock: 20180329-1

---

Bond precision: C-C = 0.0045 Å Wavelength=0.71073  
Cell: a=10.3420 (6) b=20.8081 (13) c=10.0336 (6)  
alpha=90 beta=93.121 (5) gamma=90  
Temperature: 296 K

|                | Calculated        | Reported          |
|----------------|-------------------|-------------------|
| Volume         | 2156.0 (2)        | 2156.0 (2)        |
| Space group    | P 21/c            | P 1 21/c 1        |
| Hall group     | -P 2ybc           | -P 2ybc           |
| Moiety formula | C25 H18 Cl N O3 S | C25 H18 Cl N O3 S |
| Sum formula    | C25 H18 Cl N O3 S | C25 H18 Cl N O3 S |
| Mr             | 447.91            | 447.95            |
| Dx, g cm-3     | 1.380             | 1.380             |
| Z              | 4                 | 4                 |
| Mu (mm-1)      | 0.302             | 0.302             |
| F000           | 928.0             | 929.6             |
| F000'          | 929.46            |                   |
| h, k, lmax     | 14, 28, 13        | 13, 28, 13        |
| Nref           | 5978              | 5032              |
| Tmin, Tmax     |                   | 0.730, 1.000      |
| Tmin'          |                   |                   |

Correction method= # Reported T Limits: Tmin=0.730 Tmax=1.000  
AbsCorr = MULTI-SCAN

Data completeness= 0.842 Theta(max)= 29.460

R(reflections)= 0.0589( 3099) wR2(reflections)=  
S = 1.038 Npar= 281 0.1573( 5032)

---

The following ALERTS were generated. Each ALERT has the format  
**test-name\_ALERT\_alert-type\_alert-level.**  
Click on the hyperlinks for more details of the test.

---

● **Alert level C**

|                   |                                                   |              |
|-------------------|---------------------------------------------------|--------------|
| PLAT053_ALERT_1_C | Minimum Crystal Dimension Missing (or Error) ...  | Please Check |
| PLAT054_ALERT_1_C | Medium Crystal Dimension Missing (or Error) ...   | Please Check |
| PLAT055_ALERT_1_C | Maximum Crystal Dimension Missing (or Error) ...  | Please Check |
| PLAT242_ALERT_2_C | Low 'MainMol' Ueq as Compared to Neighbors of C17 | Check        |
| PLAT334_ALERT_2_C | Small <C-C> Benzene Dist. C24 -C29                | 1.37 Ang.    |
| PLAT340_ALERT_3_C | Low Bond Precision on C-C Bonds .....             | 0.00454 Ang. |
| PLAT906_ALERT_3_C | Large K Value in the Analysis of Variance .....   | 3.637 Check  |

---

● **Alert level G**

|                   |                                                   |              |
|-------------------|---------------------------------------------------|--------------|
| PLAT068_ALERT_1_G | Reported F000 Differs from Calcd (or Missing)...  | Please Check |
| PLAT073_ALERT_1_G | H-atoms ref, but _hydrogen_treatment Reported as  | constr Check |
| PLAT431_ALERT_2_G | Short Inter HL..A Contact C120 ..030              | 3.12 Ang.    |
|                   | -1+x,3/2-y,-1/2+z =                               | 4_475 Check  |
| PLAT769_ALERT_4_G | CIF Embedded explicitly supplied scattering data  | Please Note  |
| PLAT883_ALERT_1_G | No Info/Value for _atom_sites_solution_primary    | Please Do !  |
| PLAT910_ALERT_3_G | Missing # of FCF Reflection(s) Below Theta (Min). | 4 Note       |
| PLAT912_ALERT_4_G | Missing # of FCF Reflections Above STh/L= 0.600   | 914 Note     |
| PLAT960_ALERT_3_G | Number of Intensities with I < - 2*sig(I) ...     | 11 Check     |
| PLAT978_ALERT_2_G | Number C-C Bonds with Positive Residual Density.  | 2 Info       |
| PLAT983_ALERT_1_G | The Cl-f"= 0.1603 Deviates from IT-Value =        | 0.1585 Check |
| PLAT983_ALERT_1_G | The S-f"= 0.1244 Deviates from IT-Value =         | 0.1234 Check |

---

0 **ALERT level A** = Most likely a serious problem - resolve or explain  
0 **ALERT level B** = A potentially serious problem, consider carefully  
7 **ALERT level C** = Check. Ensure it is not caused by an omission or oversight  
11 **ALERT level G** = General information/check it is not something unexpected

8 ALERT type 1 CIF construction/syntax error, inconsistent or missing data  
4 ALERT type 2 Indicator that the structure model may be wrong or deficient  
4 ALERT type 3 Indicator that the structure quality may be low  
2 ALERT type 4 Improvement, methodology, query or suggestion  
0 ALERT type 5 Informative message, check

---

It is advisable to attempt to resolve as many as possible of the alerts in all categories. Often the minor alerts point to easily fixed oversights, errors and omissions in your CIF or refinement strategy, so attention to these fine details can be worthwhile. In order to resolve some of the more serious problems it may be necessary to carry out additional measurements or structure refinements. However, the purpose of your study may justify the reported deviations and the more serious of these should normally be commented upon in the discussion or experimental section of a paper or in the "special\_details" fields of the CIF. checkCIF was carefully designed to identify outliers and unusual parameters, but every test has its limitations and alerts that are not important in a particular case may appear. Conversely, the absence of alerts does not guarantee there are no aspects of the results needing attention. It is up to the individual to critically assess their own results and, if necessary, seek expert advice.

#### **Publication of your CIF in IUCr journals**

A basic structural check has been run on your CIF. These basic checks will be run on all CIFs submitted for publication in IUCr journals (*Acta Crystallographica*, *Journal of Applied Crystallography*, *Journal of Synchrotron Radiation*); however, if you intend to submit to *Acta Crystallographica Section C* or *E* or *IUCrData*, you should make sure that [full publication checks](#) are run on the final version of your CIF prior to submission.

#### **Publication of your CIF in other journals**

Please refer to the *Notes for Authors* of the relevant journal for any special instructions relating to CIF submission.

---

**PLATON version of 18/05/2022; check.def file version of 17/05/2022**

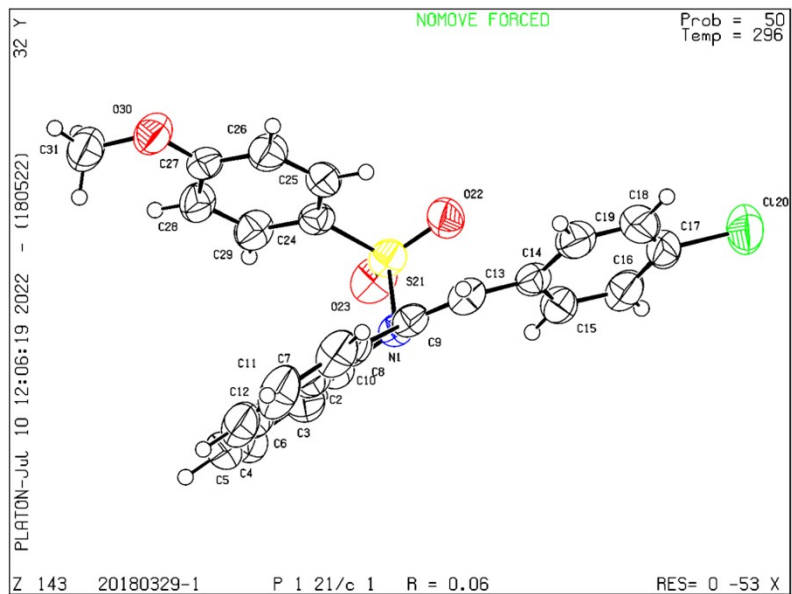

### 3. Structures of 1a-1q and 4a-4b

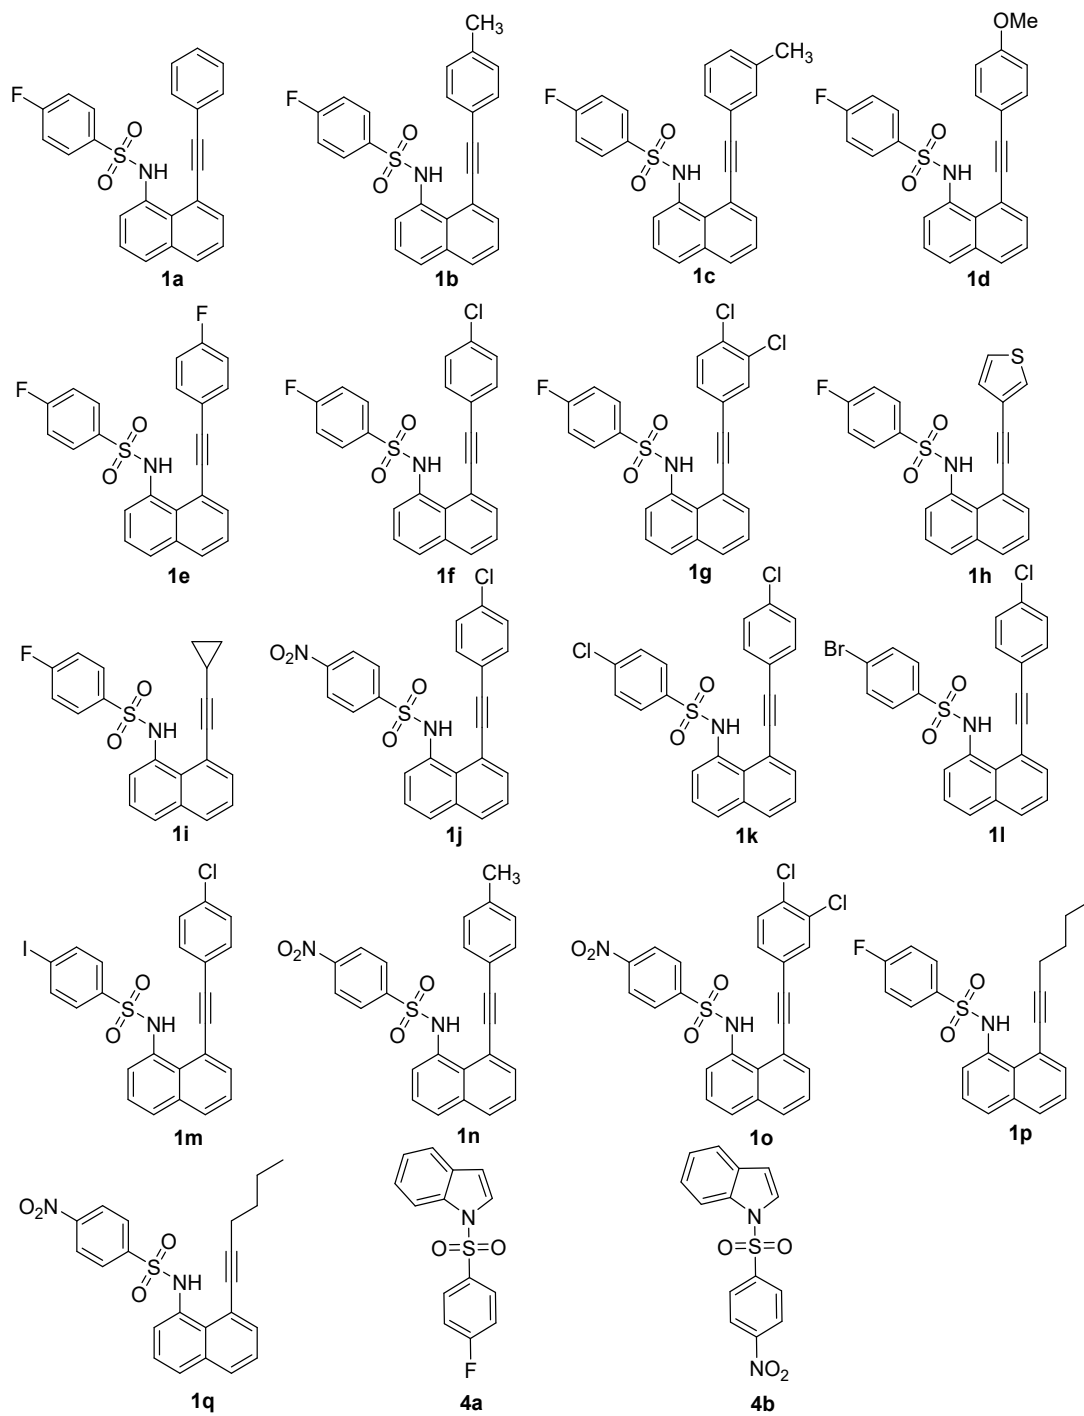

#### 4. Structures of 2a-2o and 5

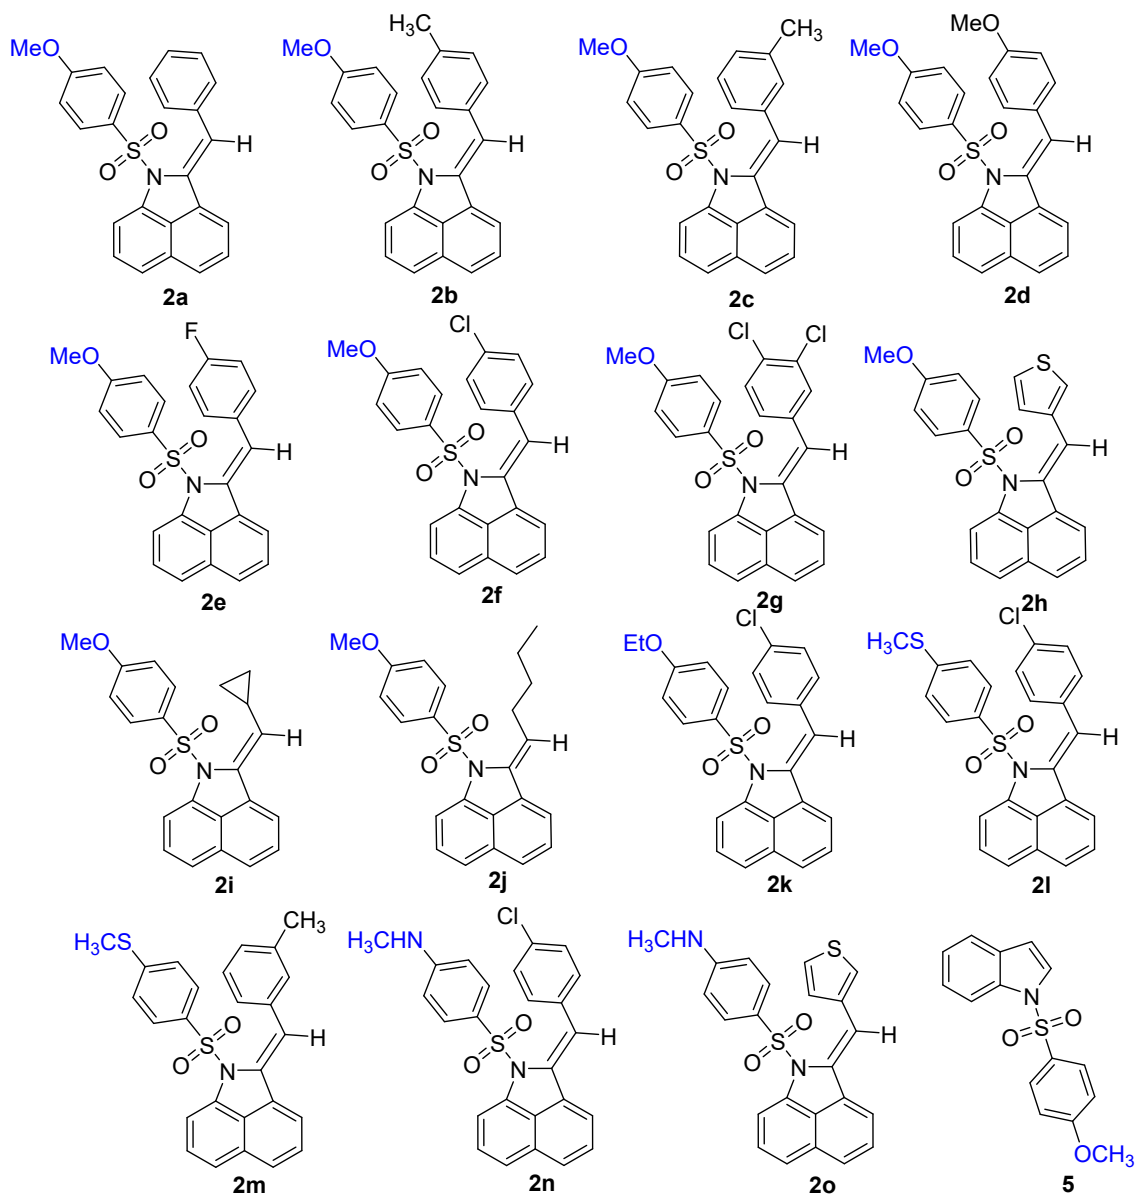



## 5. Copies of the Products $^1\text{H}$ NMR, $^{13}\text{C}$ NMR

Figure S1  $^1\text{H}$ -NMR spectrum of 2a

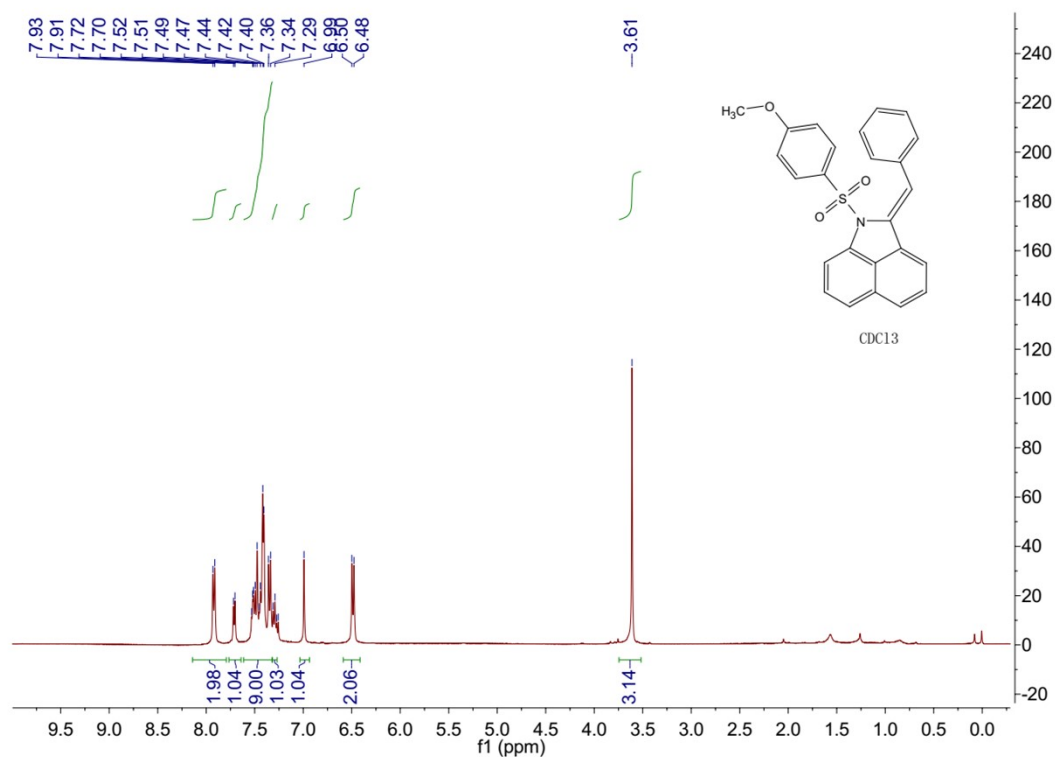

Figure S2  $^{13}\text{C}$ -NMR spectrum of 2a

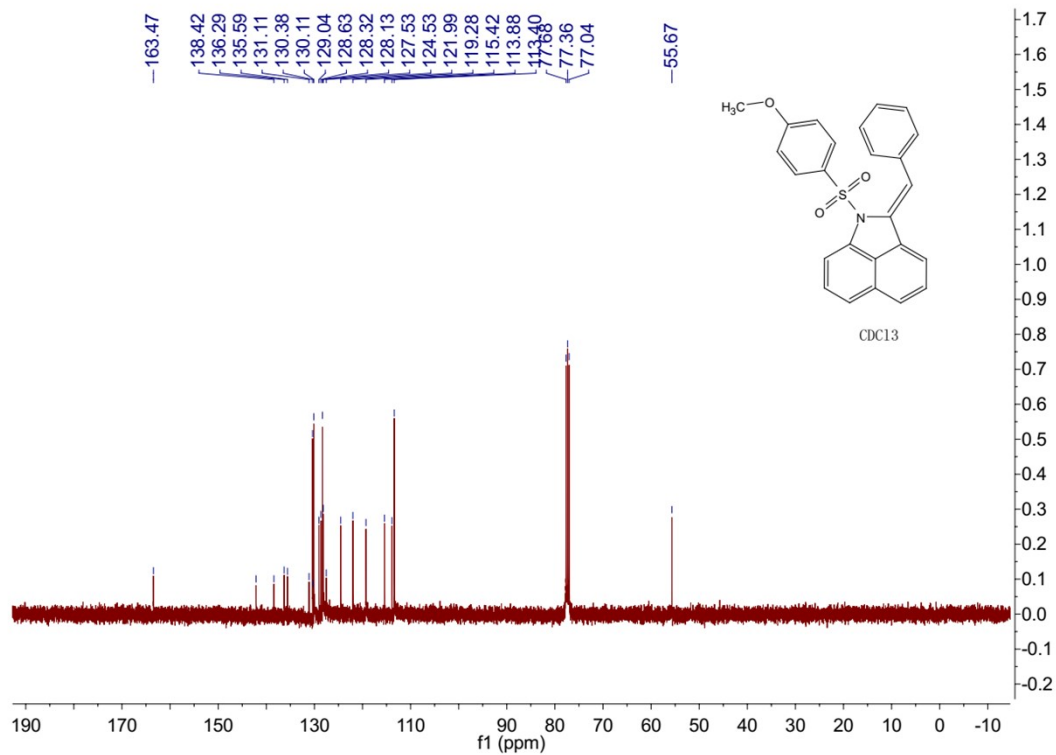

Figure S3  $^1\text{H-NMR}$  spectrum of **2b**

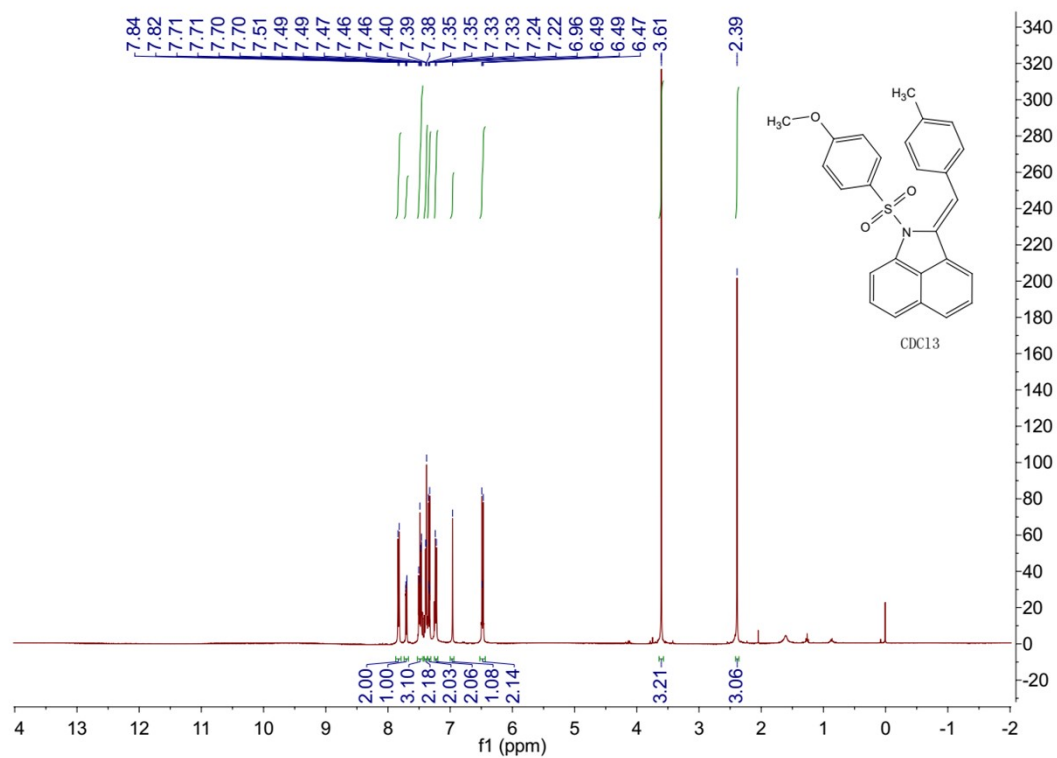

Figure S4  $^{13}\text{C-NMR}$  spectrum of **2b**

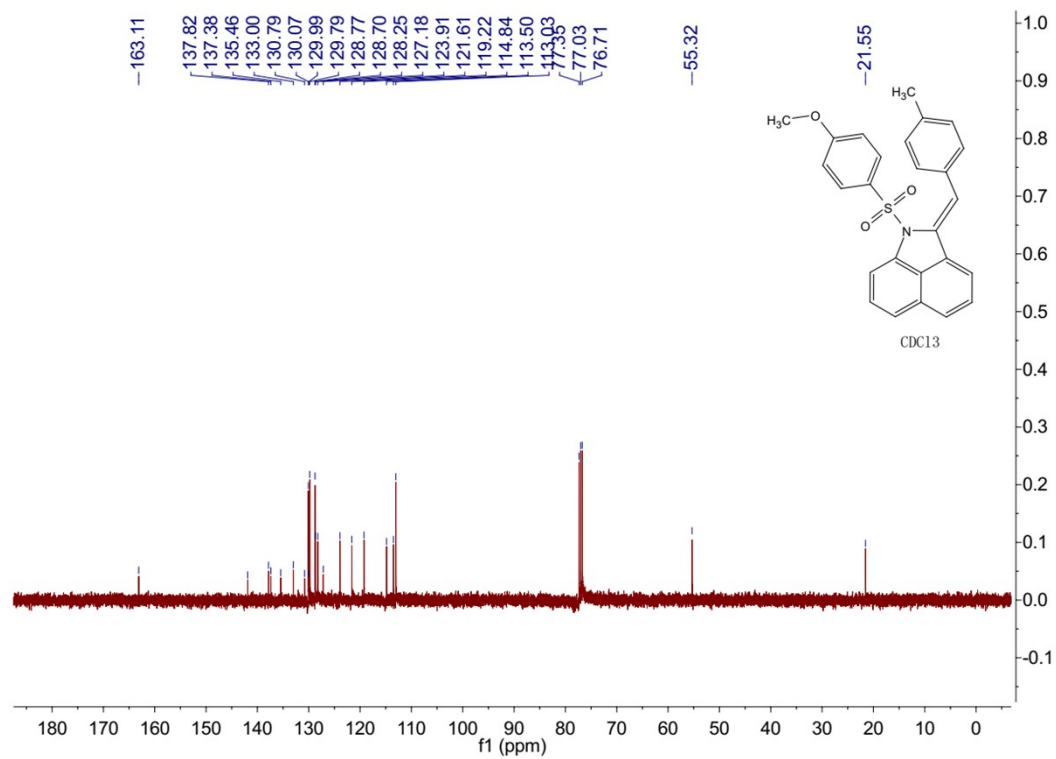

Figure S5  $^1\text{H-NMR}$  spectrum of **2c**

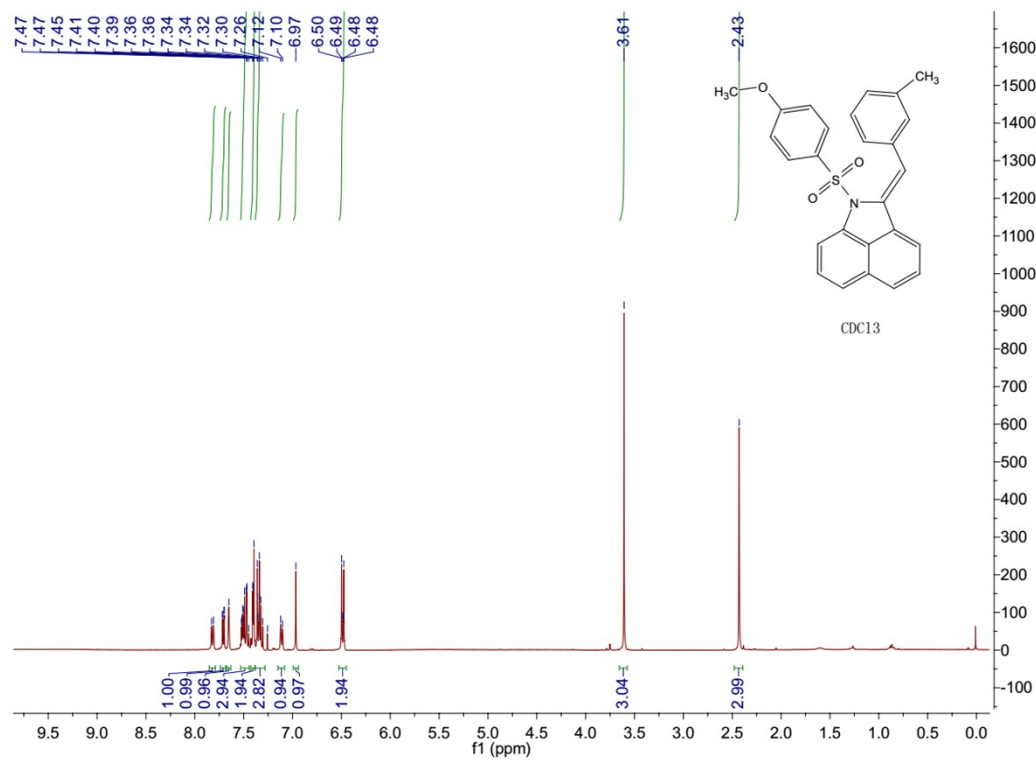

Figure S6  $^{13}\text{C-NMR}$  spectrum of **2c**

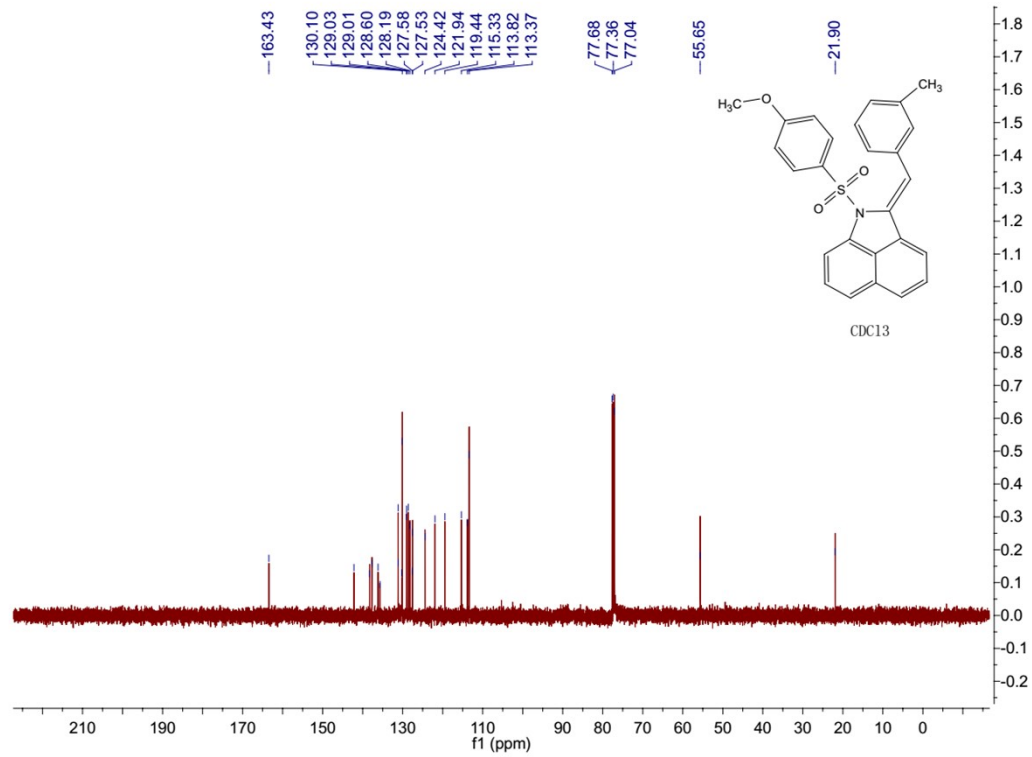

Figure S7  $^1\text{H-NMR}$  spectrum of **2d**

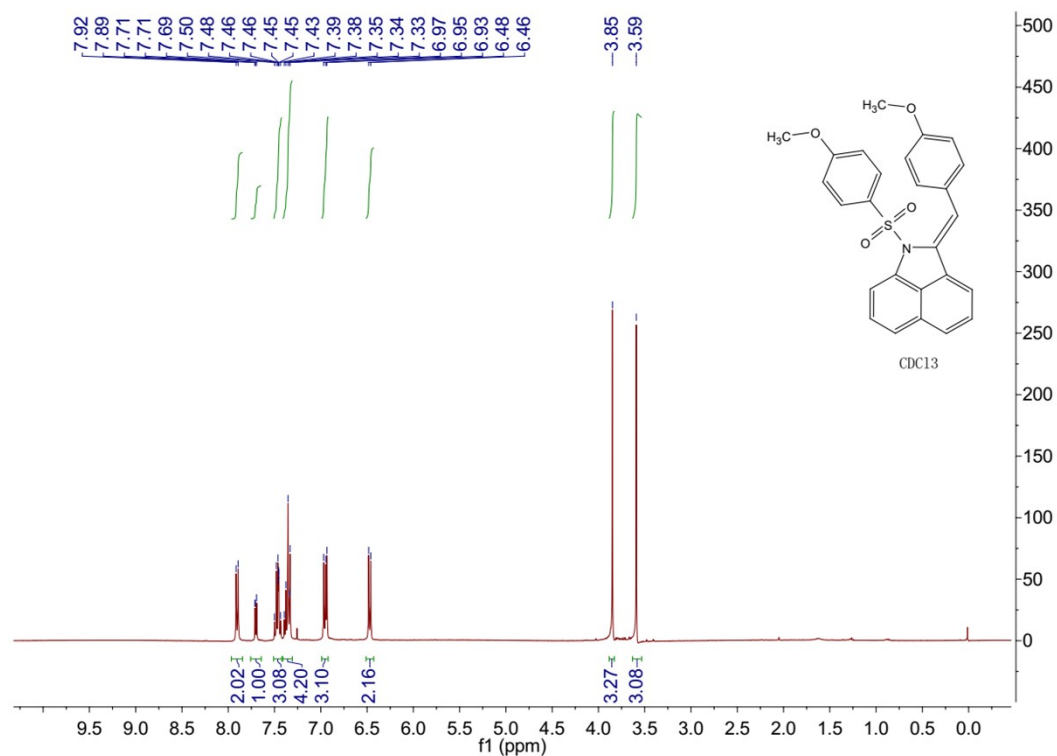

Figure S8  $^{13}\text{C-NMR}$  spectrum of **2d**

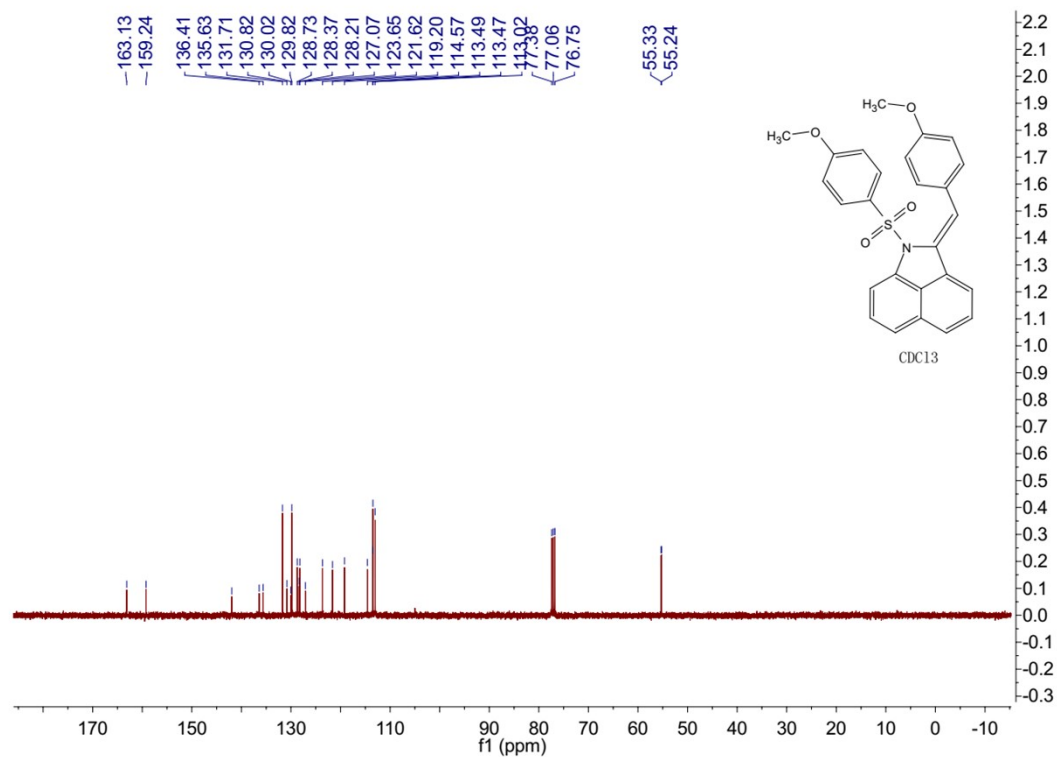

Figure S9 <sup>1</sup>H-NMR spectrum of 2e

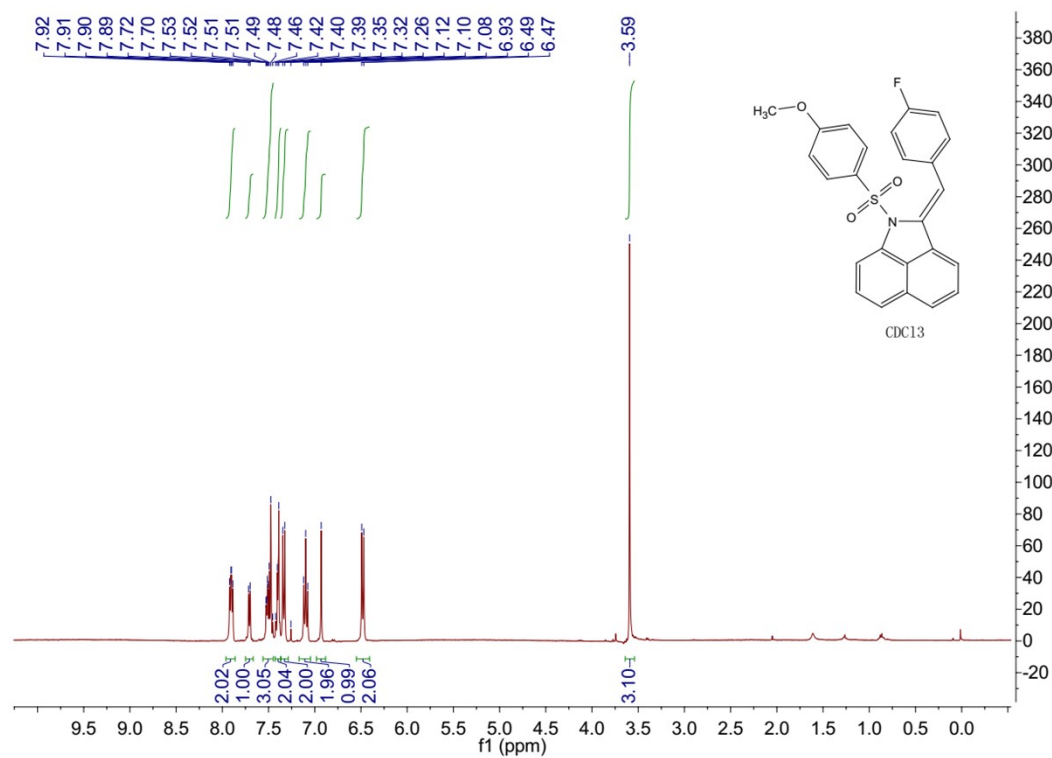

Figure S10 <sup>13</sup>C-NMR spectrum of 2e

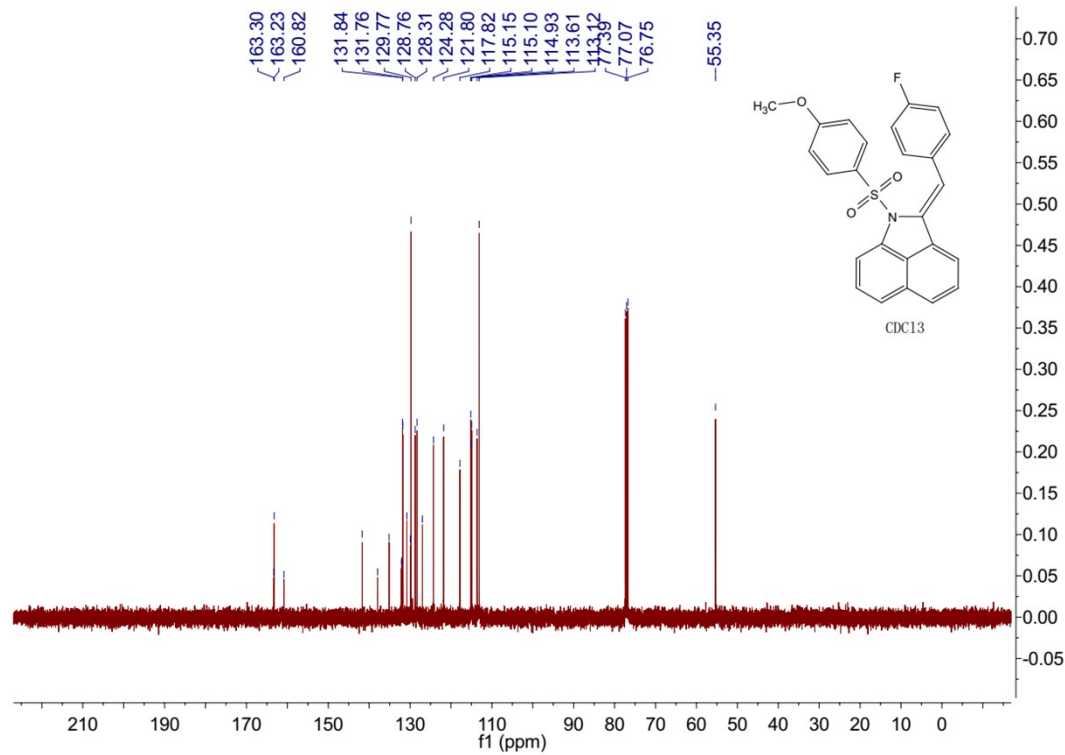

Figure S11  $^1\text{H-NMR}$  spectrum of **2f**

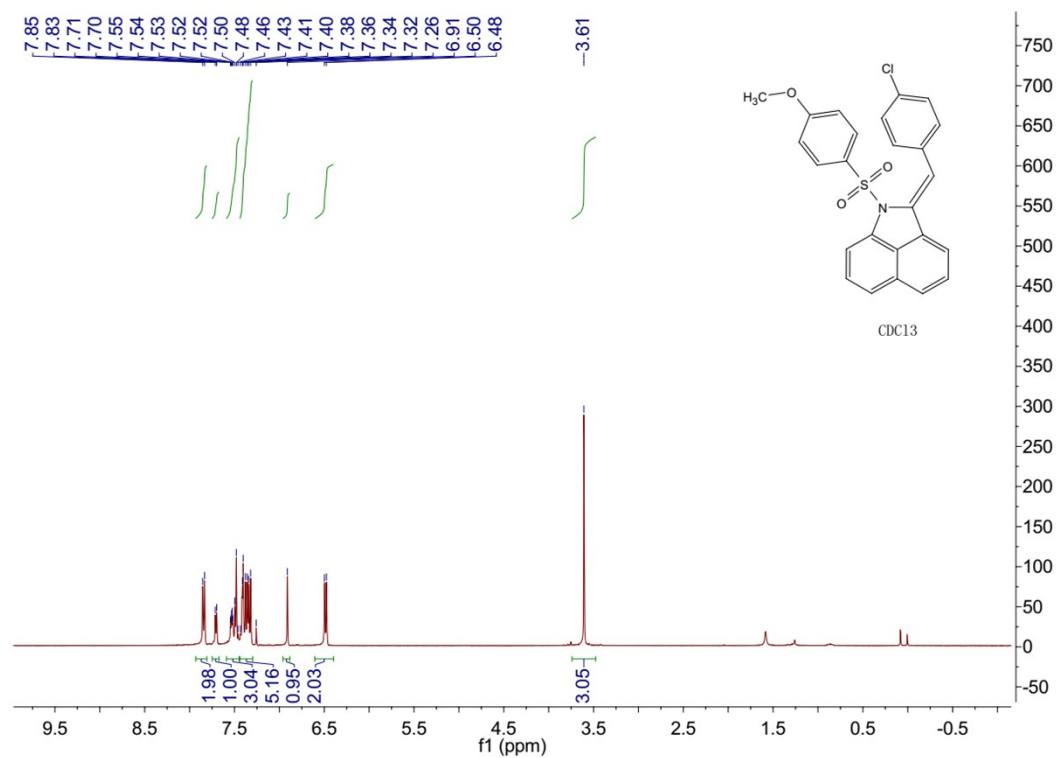

Figure S12  $^{13}\text{C-NMR}$  spectrum of **2f**

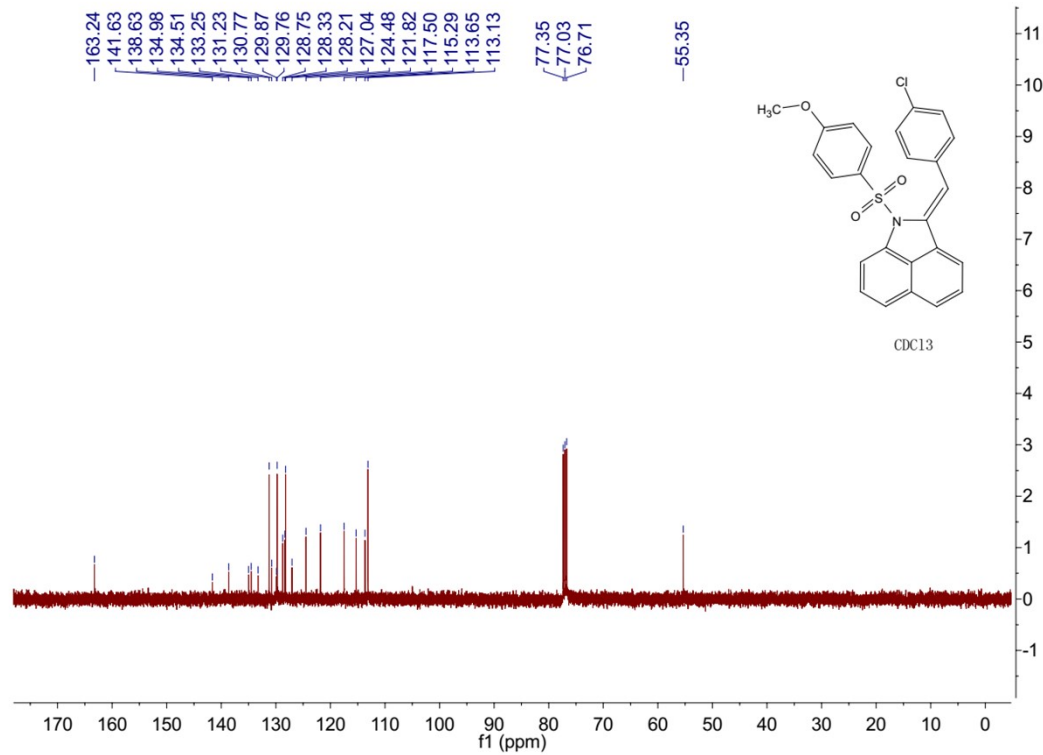

Figure S13  $^1\text{H-NMR}$  spectrum of **2g**

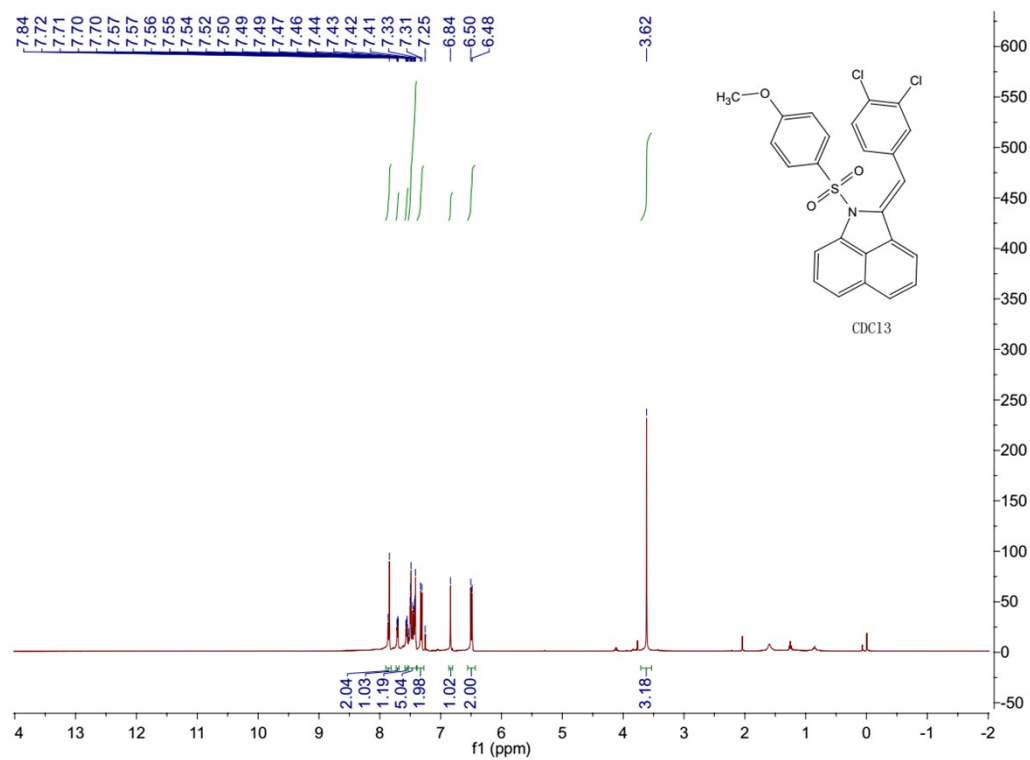

Figure S14  $^{13}\text{C-NMR}$  spectrum of **2g**

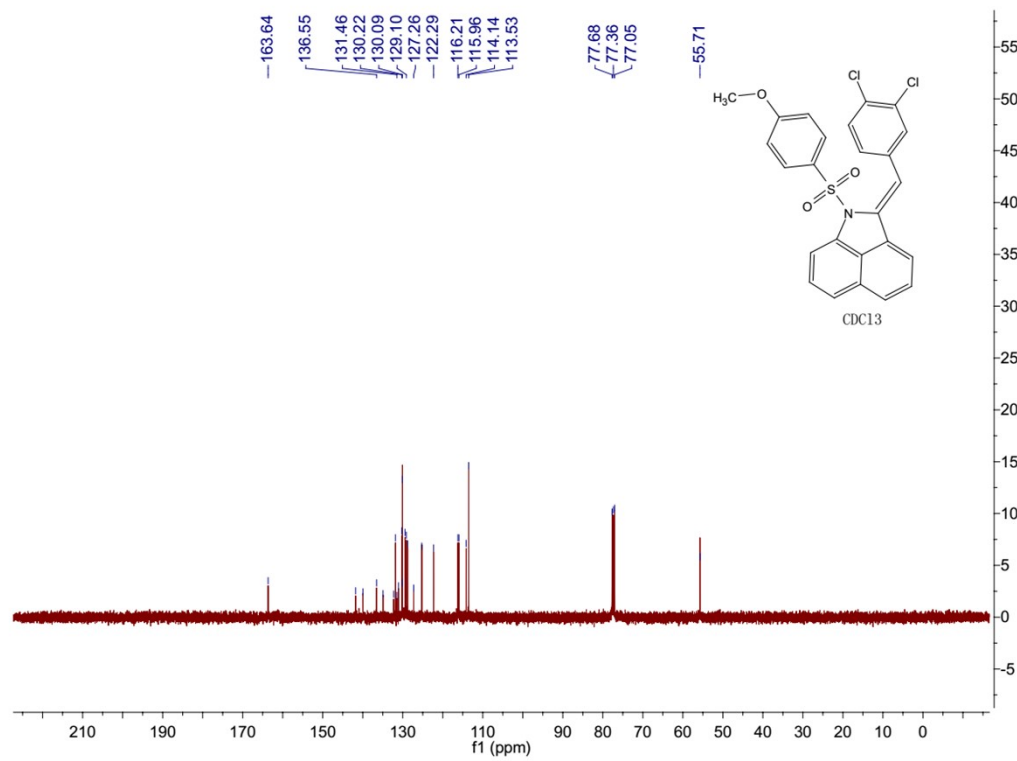

Figure S15 <sup>1</sup>H-NMR spectrum of 2h

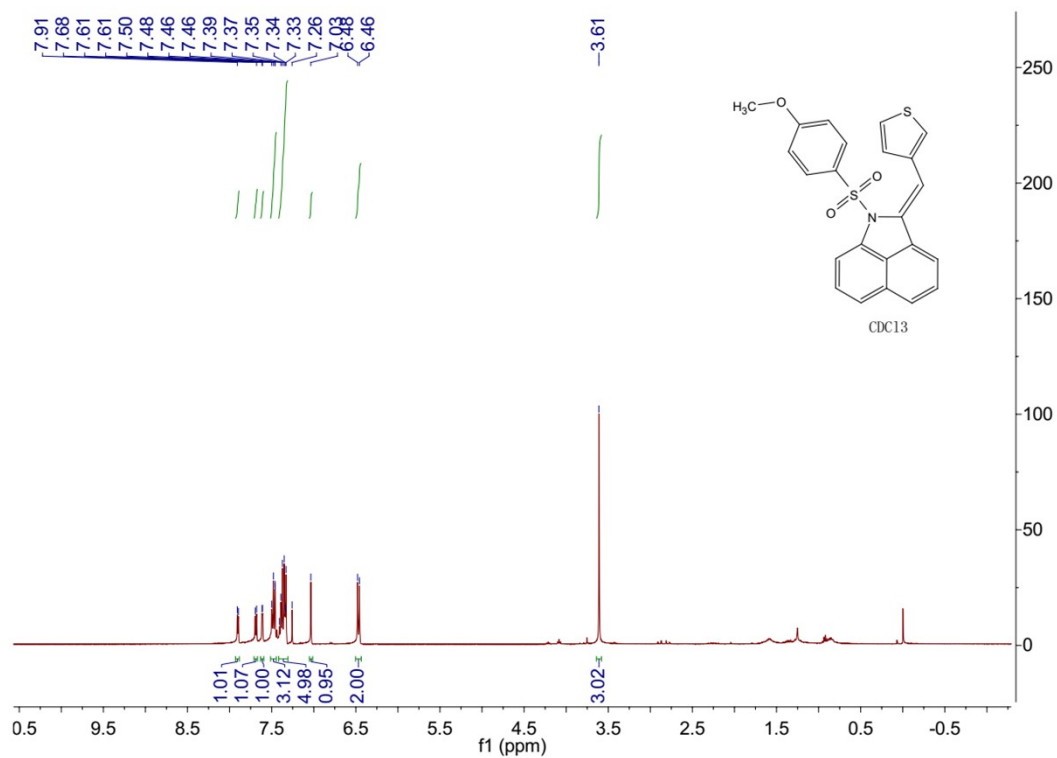

Figure S16 <sup>13</sup>C-NMR spectrum of 2h

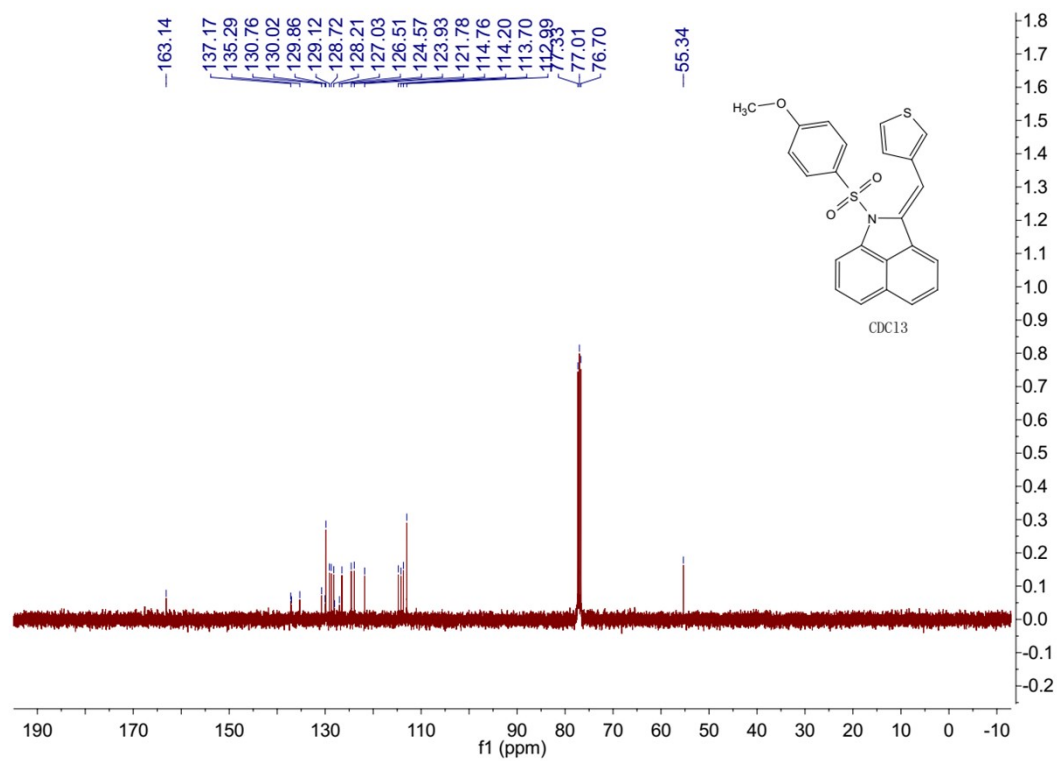



Figure S17 <sup>1</sup>H-NMR spectrum of **2i**

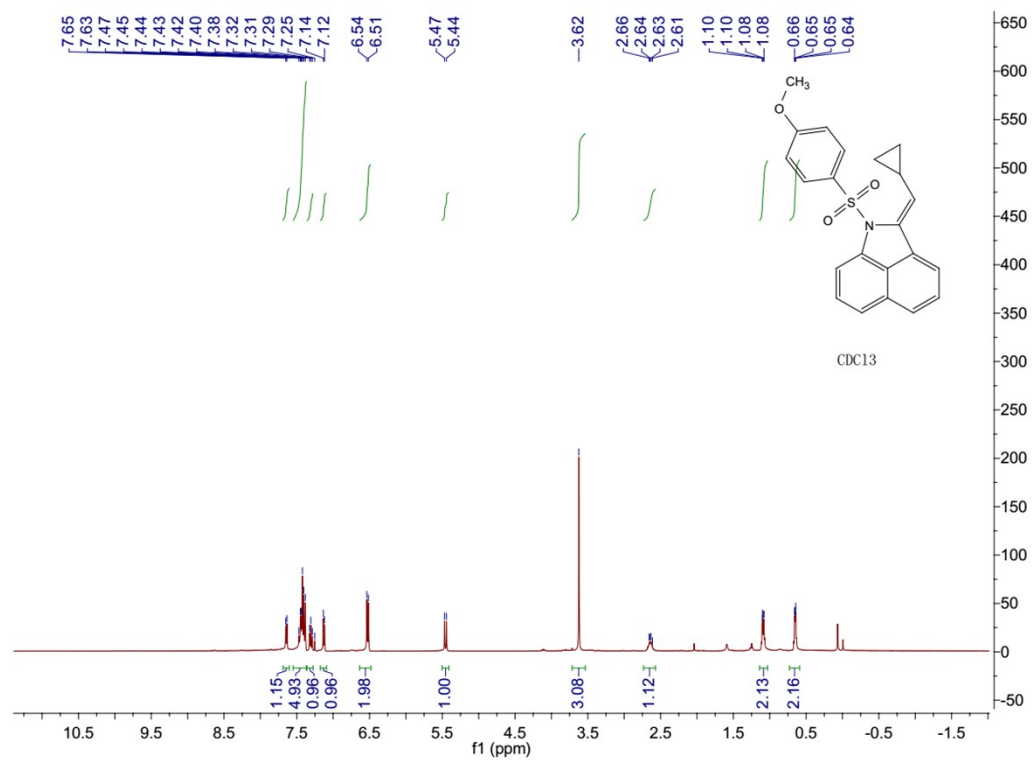

Figure S18 <sup>13</sup>C-NMR spectrum of **2i**

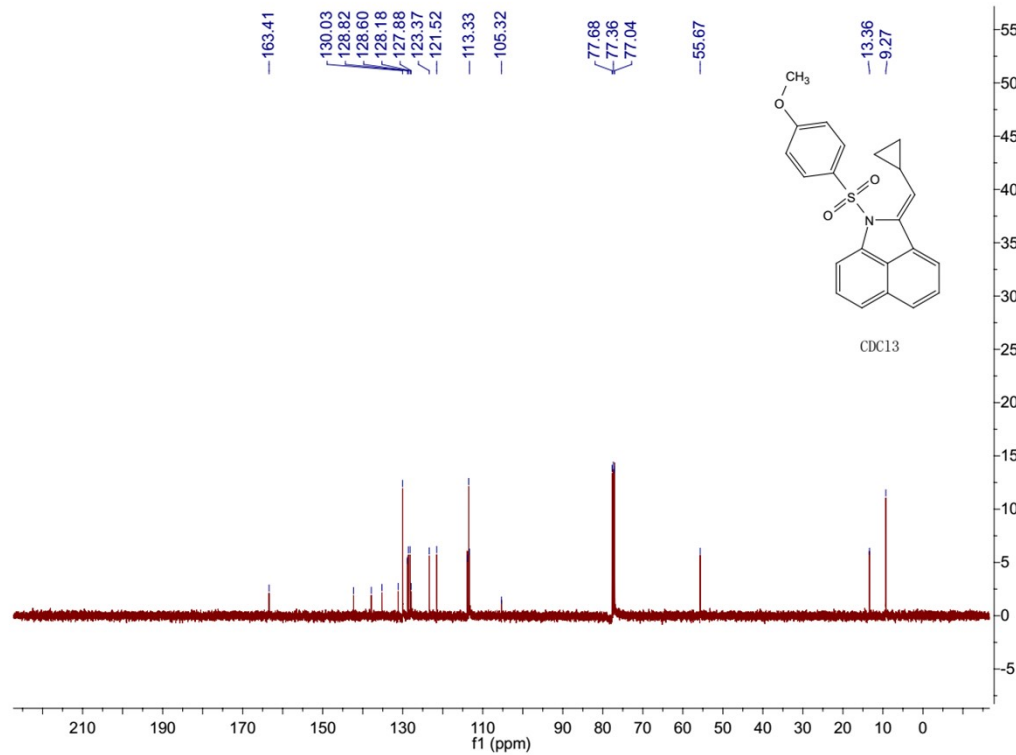

Figure S19  $^1\text{H-NMR}$  spectrum of **2j**

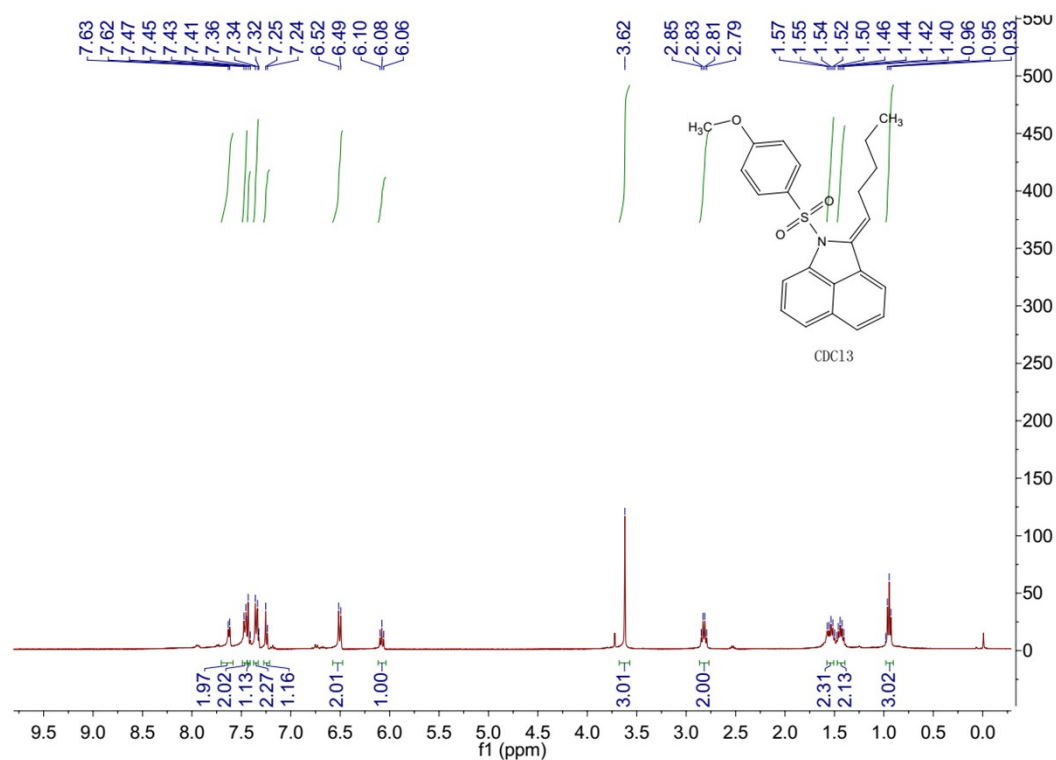

Figure S20  $^{13}\text{C-NMR}$  spectrum of **2j**

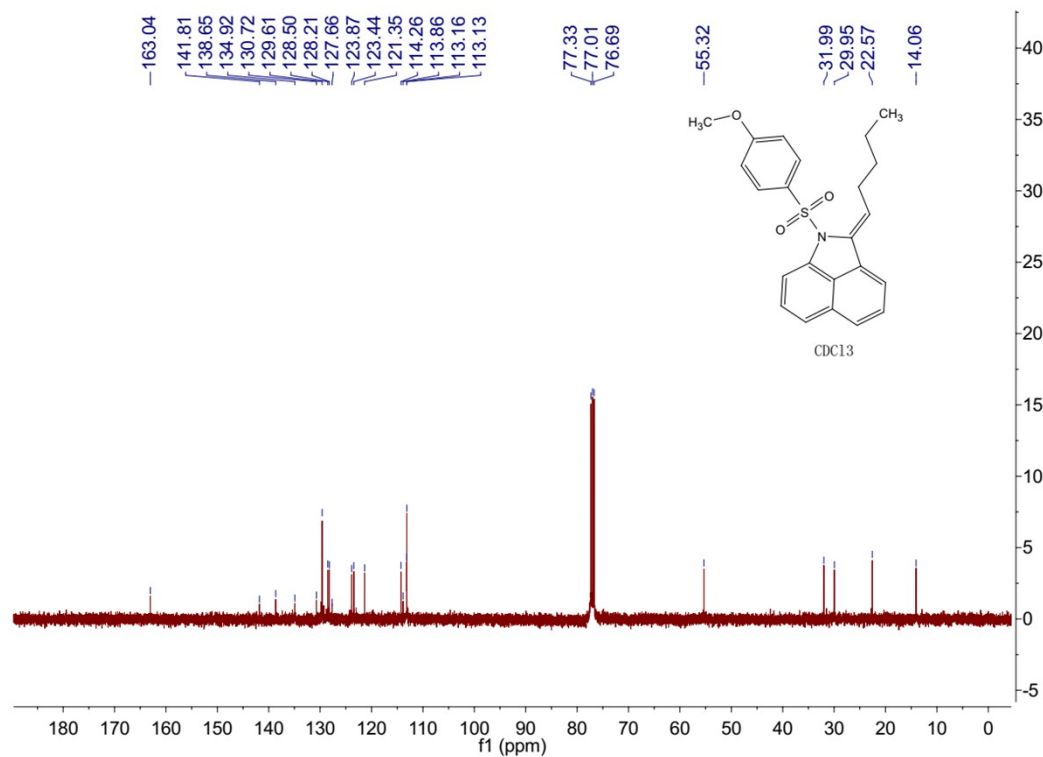

Figure S21 <sup>1</sup>H-NMR spectrum of 2k

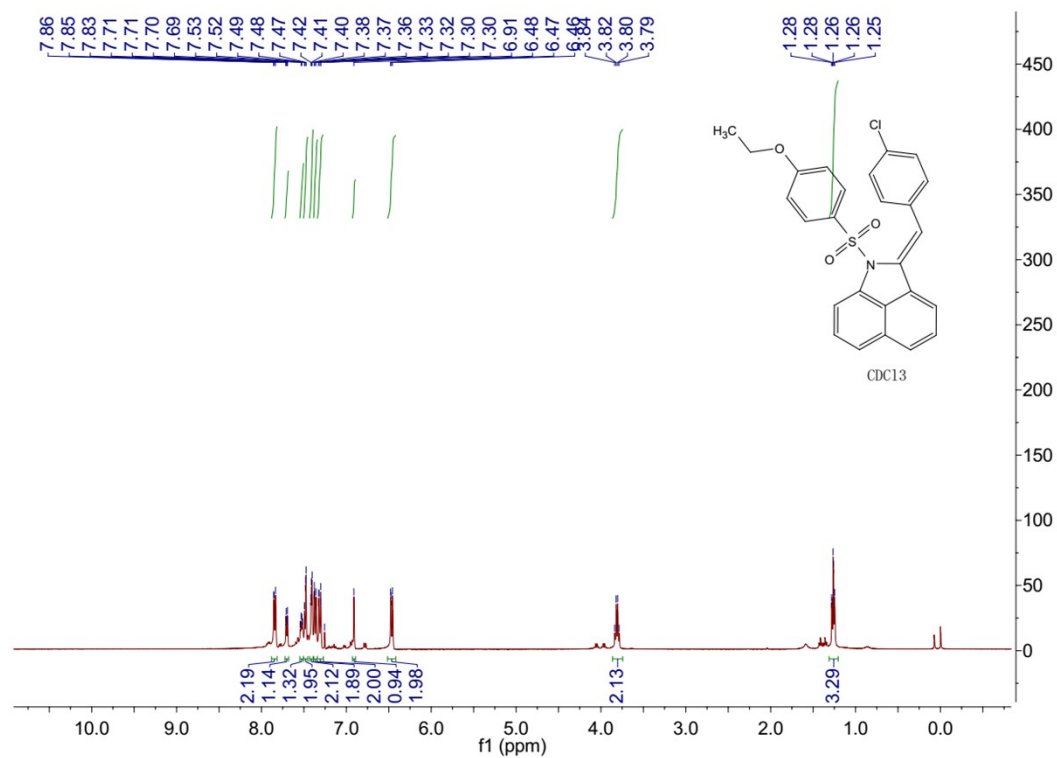

Figure S22 <sup>13</sup>C-NMR spectrum of 2k

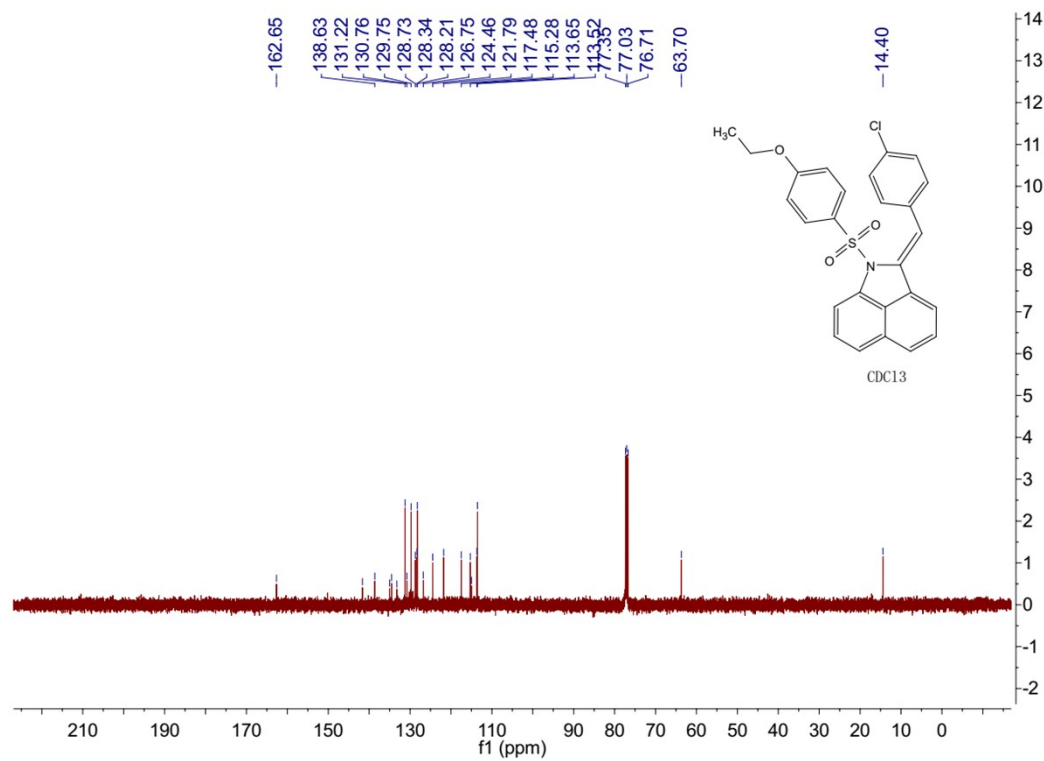

**Figure S23**  $^1\text{H-NMR}$  spectrum of **21**

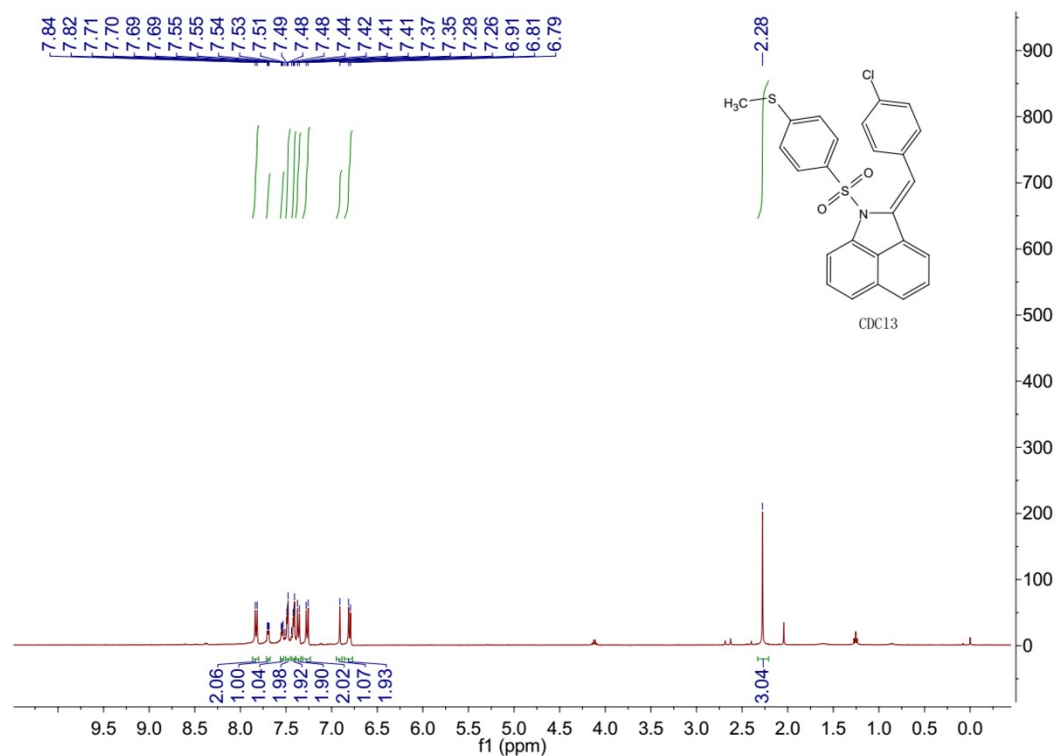

**Figure S24**  $^{13}\text{C-NMR}$  spectrum of **21**

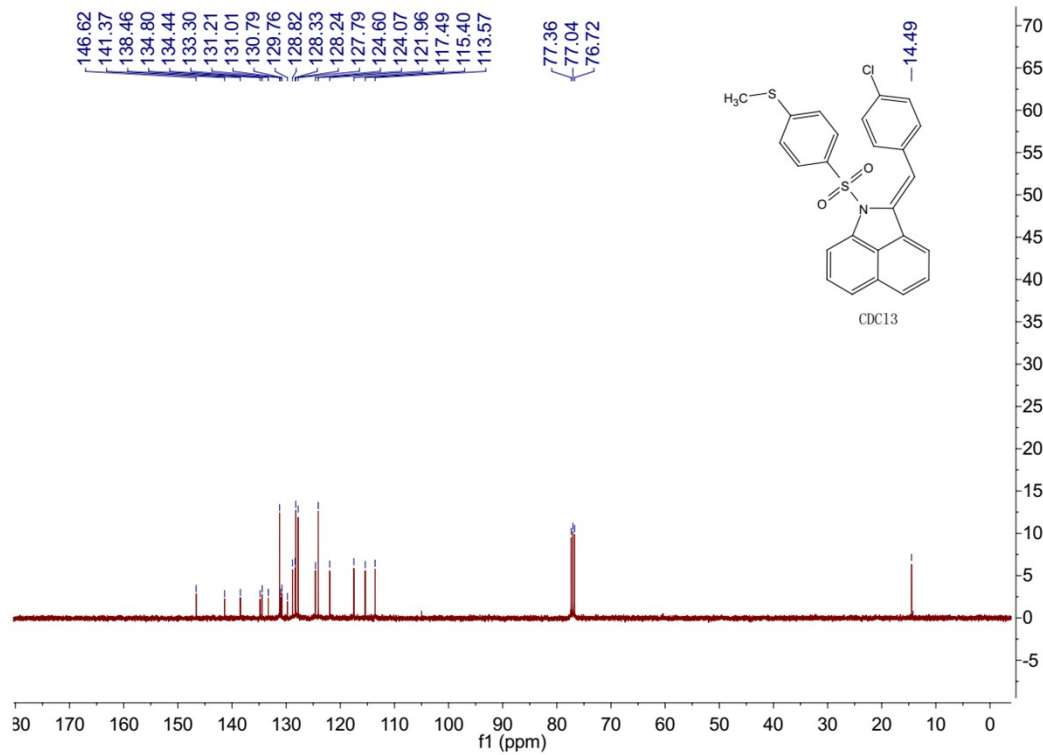

Figure S25 <sup>1</sup>H-NMR spectrum of 2m

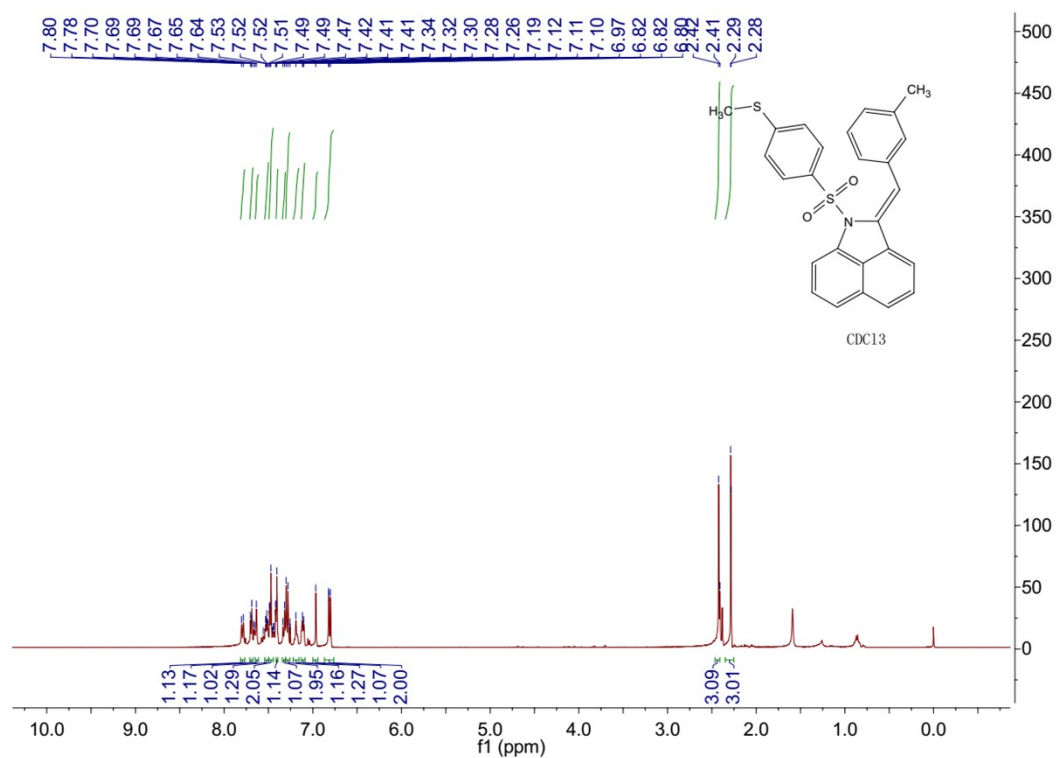

Figure S26 <sup>13</sup>C-NMR spectrum of 2m

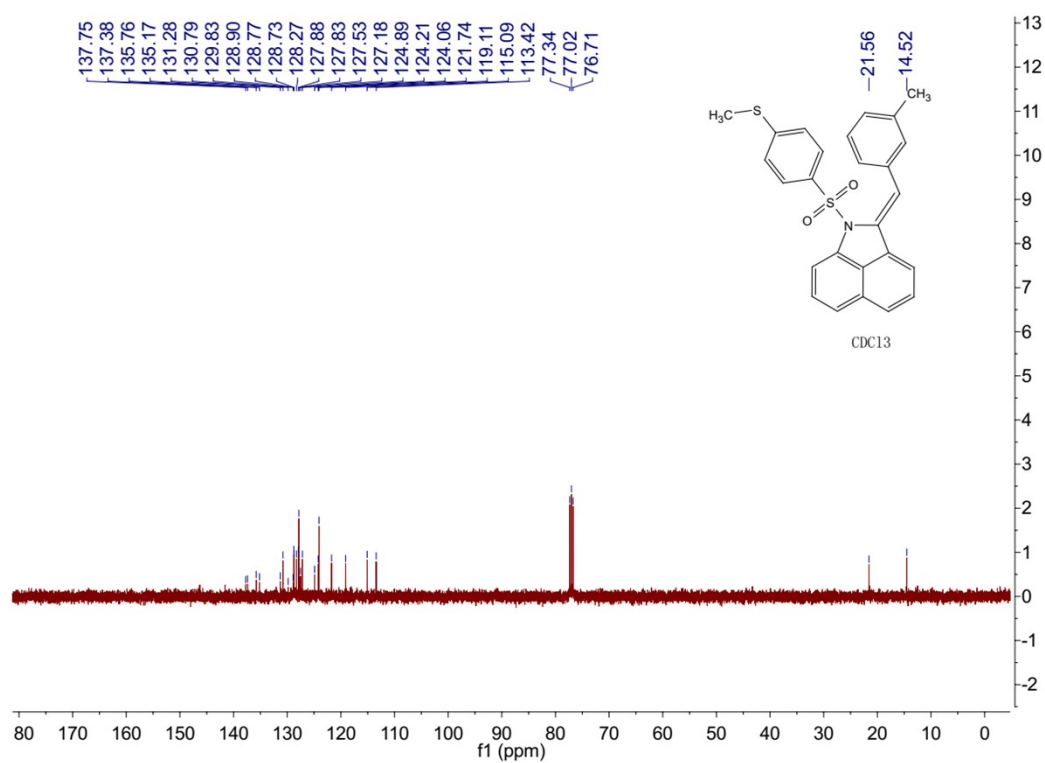

Figure S27  $^1\text{H-NMR}$  spectrum of **2n**

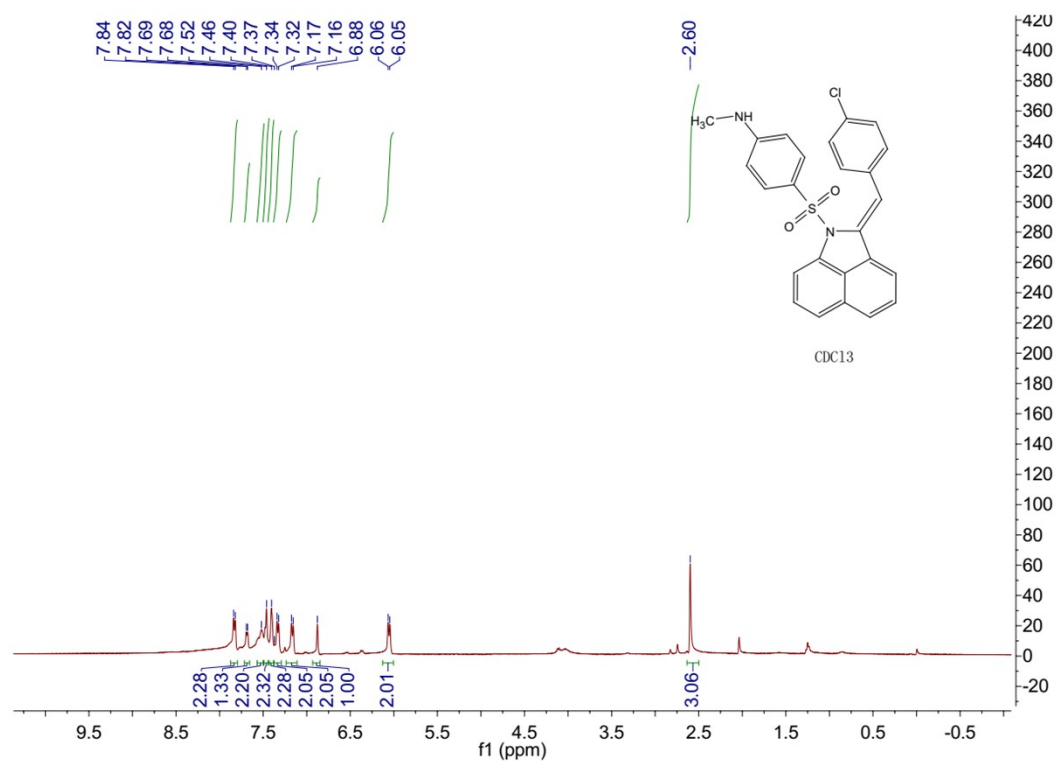

Figure S28  $^{13}\text{C-NMR}$  spectrum of **2n**

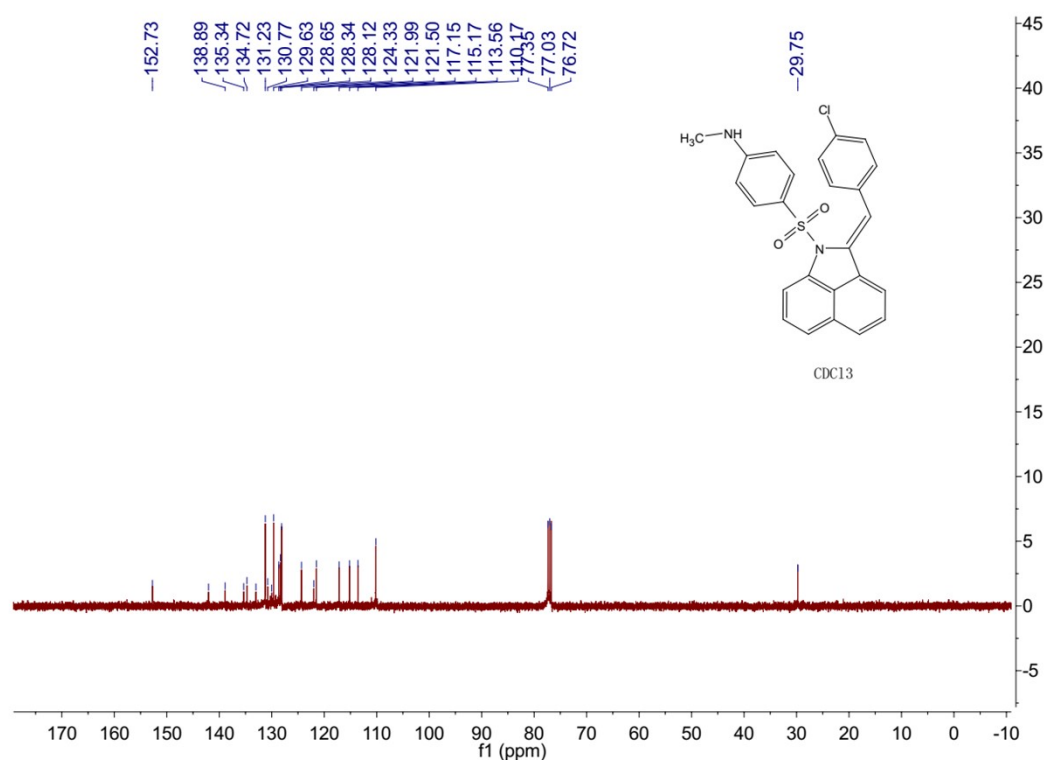

Figure S29 <sup>1</sup>H-NMR spectrum of **2o**

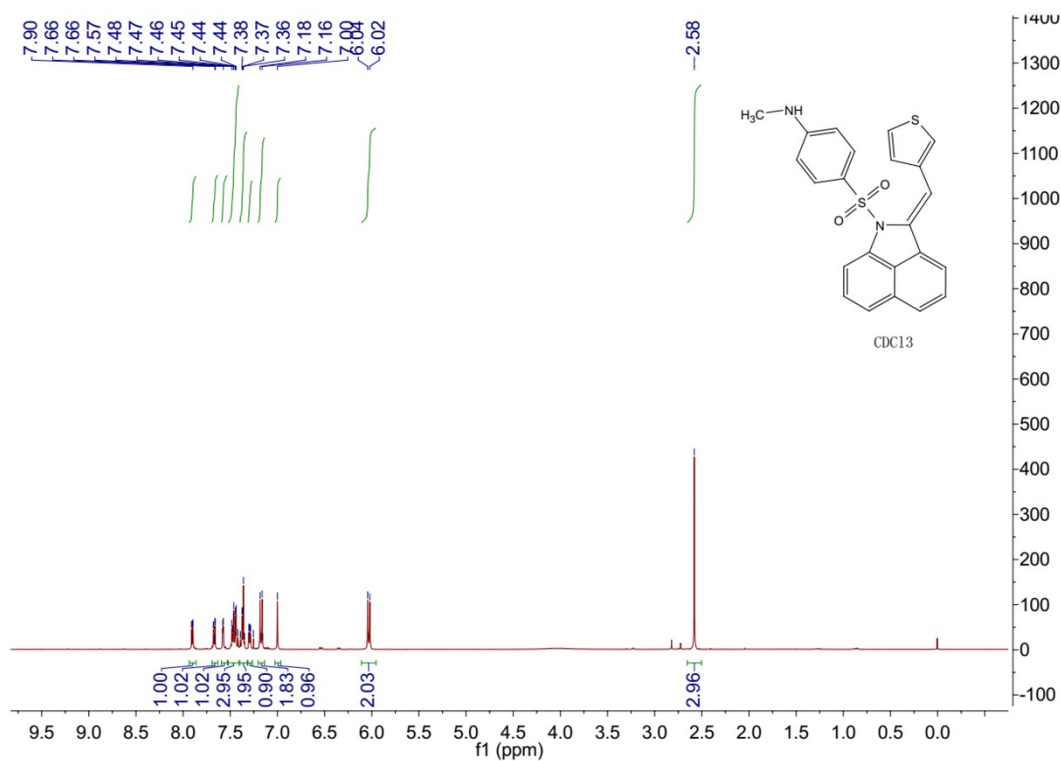

Figure S30 <sup>13</sup>C-NMR spectrum of **2o**

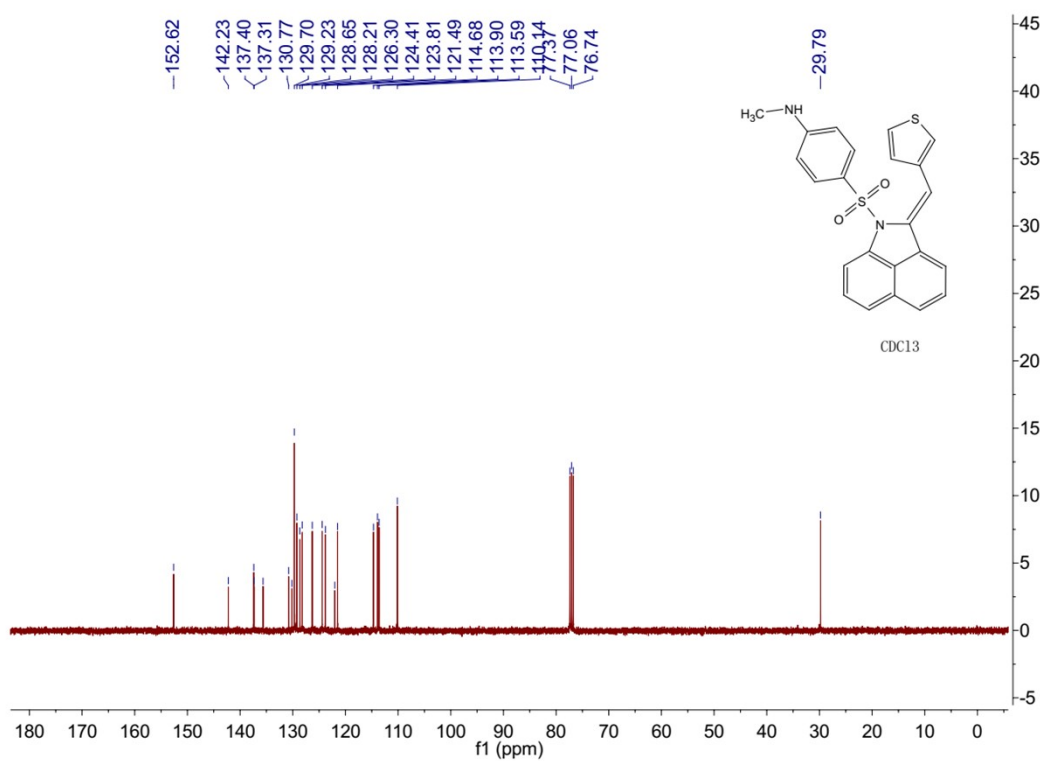

Figure S31 <sup>1</sup>H-NMR spectrum of 4

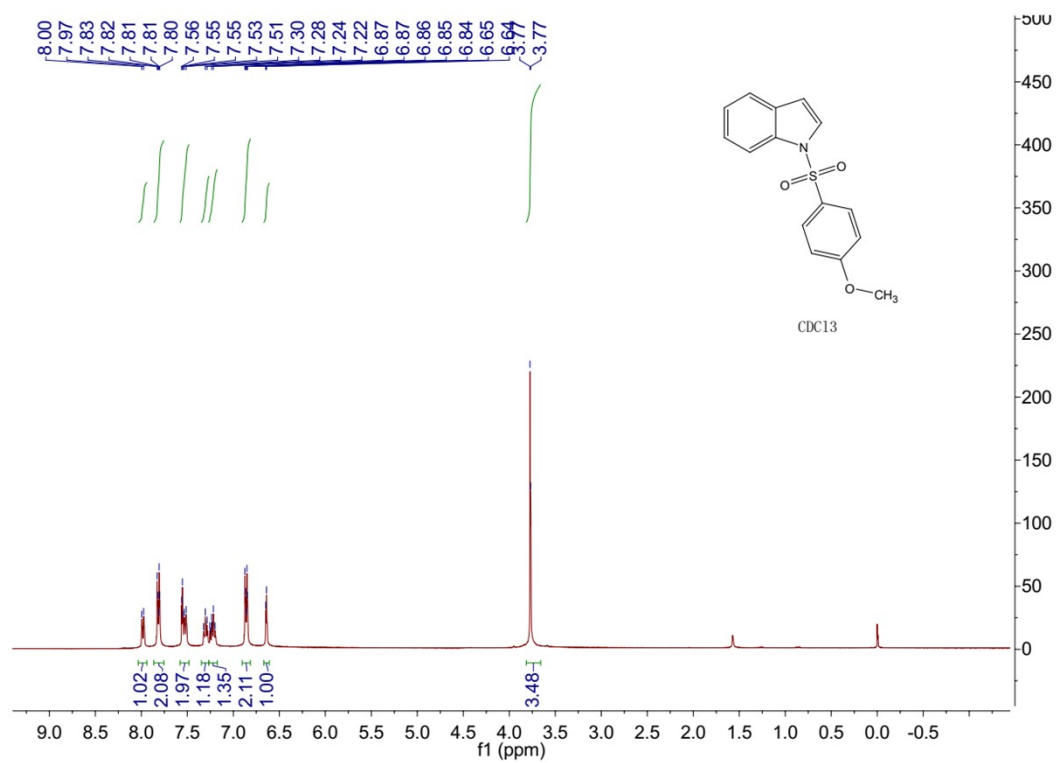

Figure S32 <sup>13</sup>C-NMR spectrum of 4

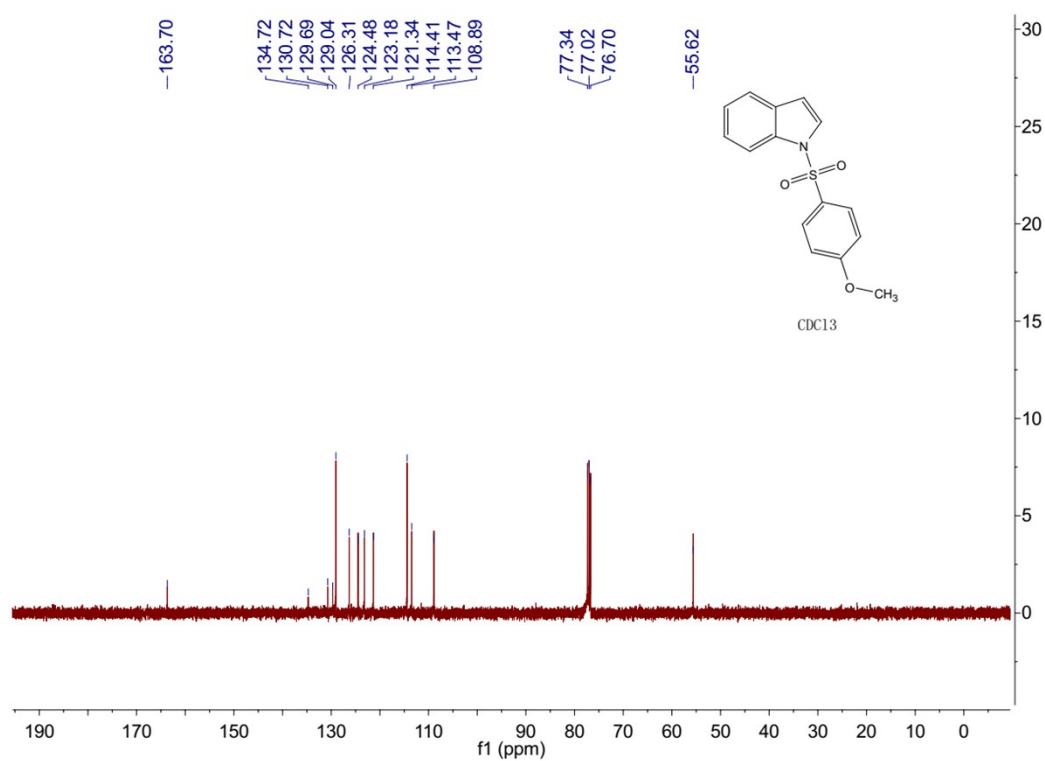

Supplement: d2ob01488b1.pdf [file d2ob01488b1.pdf]
